# Supplementary material for: Indocyanine Green-Nexturastat A-PLGA Nanoparticles Combine Photothermal and Epigenetic Therapy for Melanoma
Source: MDPI journal article supplement (doi:10.3390/nano10010161), 2020-01-17
Supplement: s1 [file s1]

## **ELECTRONIC SUPPLEMENTARY MATERIAL**

### **Indocyanine Green-Nexturastat A-PLGA Nanoparticles Combine Photothermal and Epigenetic Therapy for Melanoma**

Debbie K. Ledezma <sup>1,2</sup>, Preethi B. Balakrishnan <sup>2</sup>, Juliana Cano-Mejia <sup>2</sup>, Elizabeth E. Sweeney <sup>2</sup>,  
Melissa Hadley <sup>2</sup>, Catherine M. Bollard <sup>1,2,3</sup>, Alejandro Villagra <sup>2</sup>, Rohan Fernandes <sup>1,2,4\*</sup>

<sup>1</sup> The Institute of Biomedical Sciences, The George Washington University, 2300 Eye Street  
NW, Room 561, Washington, DC 20037, USA.

<sup>2</sup> The George Washington Cancer Center, The George Washington University, Washington, DC  
20052, USA.

<sup>3</sup> Center for Cancer and Immunology Research, Children's National Health System, 111  
Michigan Ave NW, Washington, DC 20010, USA

<sup>4</sup> Department of Medicine, The George Washington University, Washington, DC 20052, USA.

\*Correspondence: rfernandes@gwu.edu; Tel.: +1-202-994-0899

This document contains **Supplementary Figures S1-S8 and Tables S1-S3**

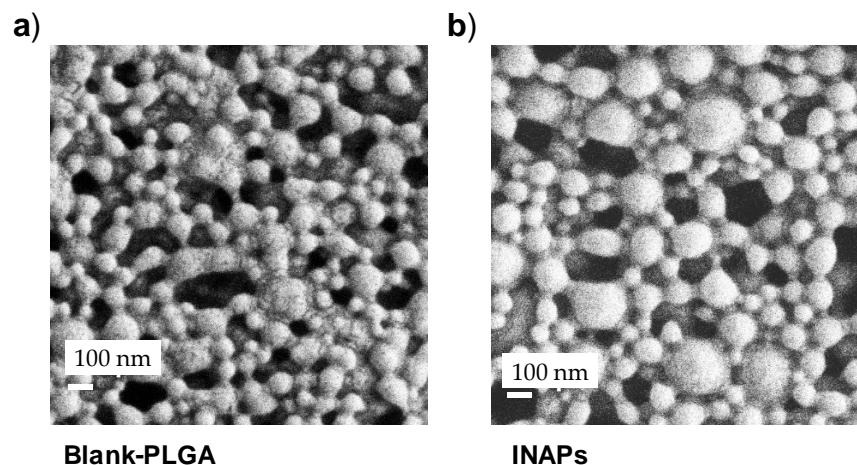

**Figure S1.** Morphology of Blank-PLGA and INAPs. Scanning electron microscope images of INAPs at high magnification (50,000x, curr 13 pA) for (a) Blank-PLGA and (b) INAPs.

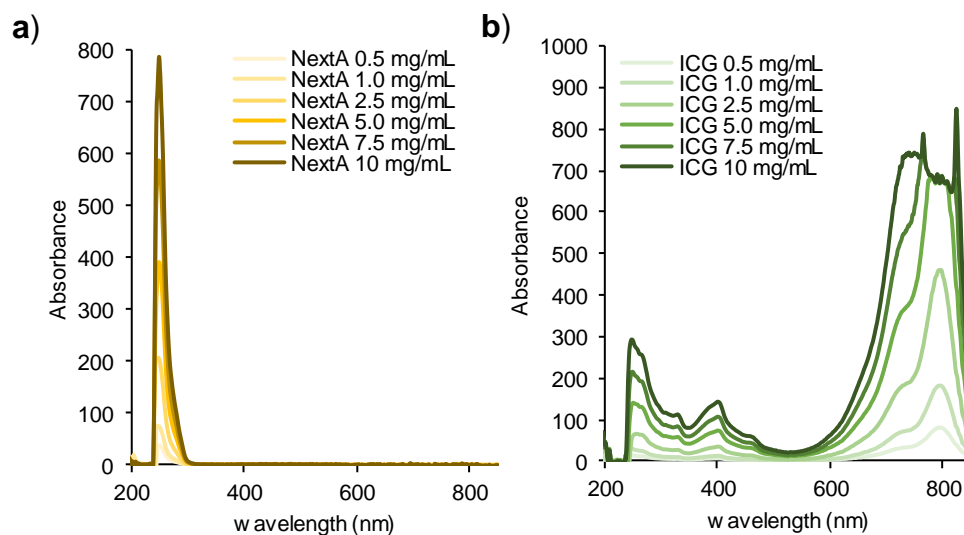

**Figure S2.** Spectra of free NextA and free ICG at varying concentrations. NextA (a) and ICG (b) were diluted in DMSO to varying concentrations (0.5 mg/mL- 10 mg/mL). NextA shows a characteristic peak at 250 nm. ICG has a characteristic peak at 780 nm, along with smaller peaks at 256 nm and 400 nm. Spectra was detected using Nanodrop, repeated in triplicates for each concentration.

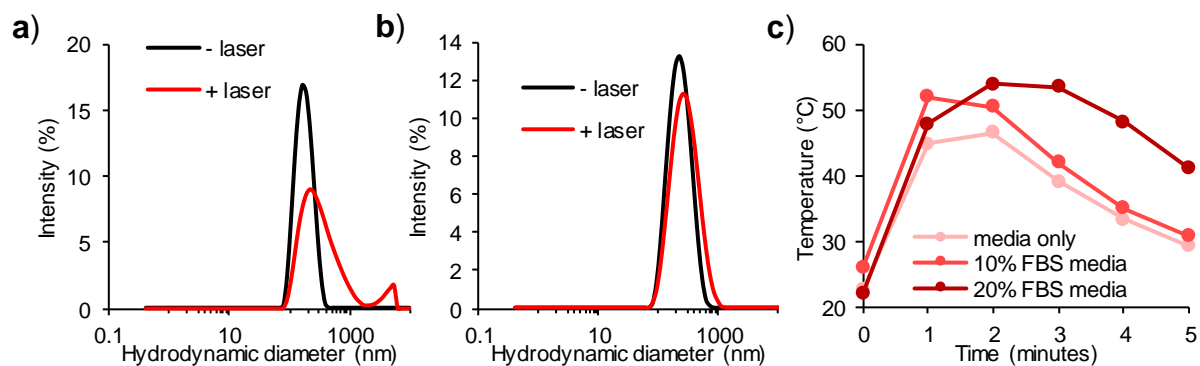

**Figure S3.** Stability of INAPs upon irradiation with the NIR laser. INAPs (4 mg/mL) were suspended in either (a) PBS or (b) complete media. The size distributions of the INAPs were assessed before (black) and after (red) NIR laser exposure for 5 minutes at 0.8 W using DLS. (c) INAPs (4 mg/mL) were also suspended in media with varying ratios of serum (no serum to 20% FBS) and irradiated with the NIR laser for 5 minutes at 0.8 W. The temperature was measured at 1-minute intervals using the thermal camera.

**Table S1.** Statistical analysis (p-values) for the study comparing the viability of SM1 cells treated with INAPs, ICG-PLGA, or controls (a) before and (b) after irradiation with the NIR laser. A two-way ANOVA followed by Sidak's comparison test with multiple comparison's test correction were applied to compare the viability across groups and treatments described in **Figure 3g** in the main text.

a)

| Multiple comparison's test (Figure 3g, - laser) | Adjusted P value |
|-------------------------------------------------|------------------|
| Vehicle (water) vs. ICG-PLGA 0.5 mg/mL          | 0.0022           |
| Vehicle (water) vs. ICG-PLGA 1.0 mg/mL          | 0.6991           |
| Vehicle (water) vs. ICG-PLGA 2.0 mg/mL          | 0.8824           |
| Vehicle (water) vs. INAPs 0.5 mg/mL             | 0.0969           |
| Vehicle (water) vs. INAPs 1.0 mg/mL             | >0.9999          |
| Vehicle (water) vs. INAPs 2.0 mg/mL             | 0.9376           |
| ICG-PLGA 0.5 mg/mL vs. ICG-PLGA 1.0 mg/mL       | <0.0001          |
| ICG-PLGA 0.5 mg/mL vs. ICG-PLGA 2.0 mg/mL       | 0.1764           |
| ICG-PLGA 0.5 mg/mL vs. INAPs 0.5 mg/mL          | 0.9720           |
| ICG-PLGA 0.5 mg/mL vs. INAPs 1.0 mg/mL          | 0.0043           |
| ICG-PLGA 0.5 mg/mL vs. INAPs 2.0 mg/mL          | <0.0001          |
| ICG-PLGA 1.0 mg/mL vs. ICG-PLGA 2.0 mg/mL       | 0.0187           |
| ICG-PLGA 1.0 mg/mL vs. INAPs 0.5 mg/mL          | 0.0005           |
| ICG-PLGA 1.0 mg/mL vs. INAPs 1.0 mg/mL          | 0.5022           |
| ICG-PLGA 1.0 mg/mL vs. INAPs 2.0 mg/mL          | >0.9999          |
| ICG-PLGA 2.0 mg/mL vs. INAPs 0.5 mg/mL          | 0.9881           |
| ICG-PLGA 2.0 mg/mL vs. INAPs 1.0 mg/mL          | 0.9697           |
| ICG-PLGA 2.0 mg/mL vs. INAPs 2.0 mg/mL          | 0.0534           |
| INAPs 0.5 mg/mL vs. INAPs 1.0 mg/mL             | 0.1719           |
| INAPs 0.5 mg/mL vs. INAPs 2.0 mg/mL             | 0.0015           |
| INAPs 1.0 mg/mL vs. INAPs 2.0 mg/mL             | 0.8134           |

b)

| Multitple Comparison's test (Figure 3g, + laser) | Adjusted P value |
|--------------------------------------------------|------------------|
| Vehicle (water) vs. ICG-PLGA 0.5 mg/mL           | 0.2936           |
| Vehicle (water) vs. ICG-PLGA 1.0 mg/mL           | <0.0001          |
| Vehicle (water) vs. ICG-PLGA 2.0 mg/mL           | <0.0001          |
| Vehicle (water) vs. INAPs 0.5 mg/mL              | 0.0685           |
| Vehicle (water) vs. INAPs 1.0 mg/mL              | <0.0001          |
| Vehicle (water) vs. INAPs 2.0 mg/mL              | <0.0001          |
| ICG-PLGA 0.5 mg/mL vs. ICG-PLGA 1.0 mg/mL        | 0.0071           |
| ICG-PLGA 0.5 mg/mL vs. ICG-PLGA 2.0 mg/mL        | <0.0001          |
| ICG-PLGA 0.5 mg/mL vs. INAPs 0.5 mg/mL           | <0.0001          |
| ICG-PLGA 0.5 mg/mL vs. INAPs 1.0 mg/mL           | 0.0045           |
| ICG-PLGA 0.5 mg/mL vs. INAPs 2.0 mg/mL           | <0.0001          |
| ICG-PLGA 1.0 mg/mL vs. ICG-PLGA 2.0 mg/mL        | <0.0001          |
| ICG-PLGA 1.0 mg/mL vs. INAPs 0.5 mg/mL           | <0.0001          |
| ICG-PLGA 1.0 mg/mL vs. INAPs 1.0 mg/mL           | >0.9999          |
| ICG-PLGA 1.0 mg/mL vs. INAPs 2.0 mg/mL           | <0.0001          |
| ICG-PLGA 2.0 mg/mL vs. INAPs 0.5 mg/mL           | <0.0001          |
| ICG-PLGA 2.0 mg/mL vs. INAPs 1.0 mg/mL           | <0.0001          |
| ICG-PLGA 2.0 mg/mL vs. INAPs 2.0 mg/mL           | >0.9999          |
| INAPs 0.5 mg/mL vs. INAPs 1.0 mg/mL              | <0.0001          |
| INAPs 0.5 mg/mL vs. INAPs 2.0 mg/mL              | <0.0001          |
| INAPs 1.0 mg/mL vs. INAPs 2.0 mg/mL              | <0.0001          |

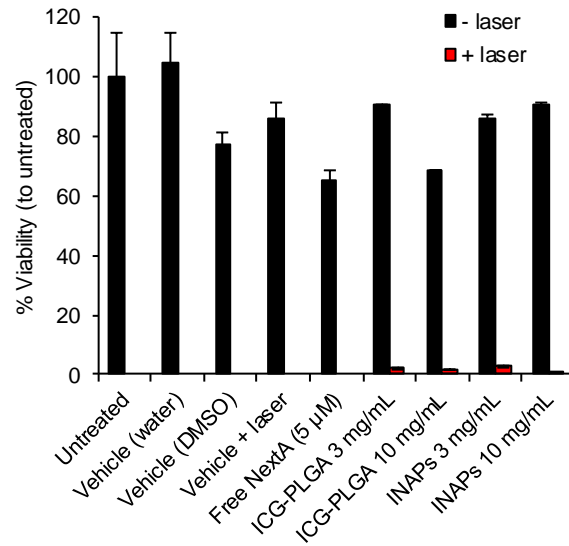

**Figure S4.** Melanoma cell viability at higher INAPs concentration *in vitro*. B16F10 cells were resuspended in complete RPMI media and treated with INAPs and ICG-PLGA at 3 mg/mL and 10 mg/mL or with controls in the presence (red) or absence (black) of 0.8 W NIR laser for 10 minutes. Treatment with 10 mg/mL INAPs resulted in 0.7% viability compared to untreated control.

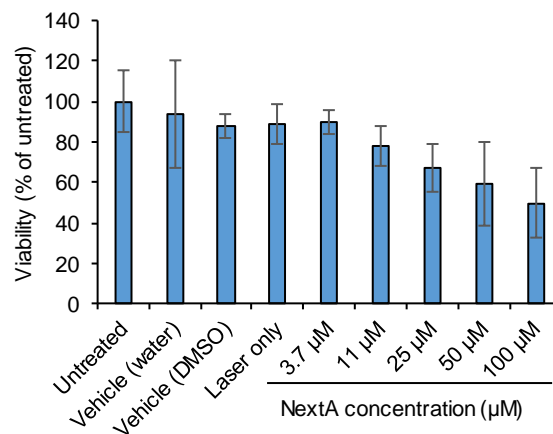

**Figure S5.** NextA cytotoxicity at varying concentrations. SM1 cells were treated with varying concentrations of NextA (3.7 µM – 100 µM) for 24 hours. Cells were collected and resuspended in PBS to determine viability using the Cell Titer-Glo ATP assay. Luminescence for the assay was measured with a SpectraMax plate reader.

**Table S2.** Statistical analysis (p-values) for the study comparing the inhibition of HDAC activity by INAPs and controls (ICG-PLGA, NextA-PLGA, Free NextA, LBH, and vehicle) across multiple treatments. A one-way ANOVA followed by Sidak's comparison test with multiple comparison's test correction were applied to compare the inhibition of HDAC activity as a function of (a) various treatment groups, (b) INAP concentration, and (c) time as described in **Figure 4** of the main text. Blank-PLGA were omitted from analysis in (a).

a)

| <b>Multiple comparisons test (Figure 4a, - laser)</b> | <b>Adjusted P Value</b> |
|-------------------------------------------------------|-------------------------|
| Vehicle vs. LBH (5 $\mu$ M)                           | 0.0001                  |
| Vehicle vs. Free-NextA (5 $\mu$ M)                    | 0.0003                  |
| Vehicle vs. NextA-PLGA                                | 0.0001                  |
| Vehicle vs. ICG-PLGA                                  | 0.0047                  |
| Vehicle vs. INAPs                                     | 0.0001                  |
| LBH (5 $\mu$ M) vs. Free-NextA (5 $\mu$ M)            | 0.9944                  |
| LBH (5 $\mu$ M) vs. NextA-PLGA                        | >0.9999                 |
| LBH (5 $\mu$ M) vs. ICG-PLGA                          | 0.2223                  |
| LBH (5 $\mu$ M) vs. INAPs                             | >0.9999                 |
| Free-NextA (5 $\mu$ M) vs. NextA-PLGA                 | 0.9956                  |
| Free-NextA (5 $\mu$ M) vs. ICG-PLGA                   | 0.4434                  |
| Free-NextA (5 $\mu$ M) vs. INAPs                      | 0.9923                  |
| NextA-PLGA vs. ICG-PLGA                               | 0.2309                  |
| NextA-PLGA vs. INAPs                                  | >0.9999                 |
| ICG-PLGA vs. INAPs                                    | 0.2105                  |

b)

| <b>Multiple comparisons test (figure 4b, - laser)</b> | <b>Adjusted P Value</b> |
|-------------------------------------------------------|-------------------------|
| Untreated vs. Vehicle (DMSO)                          | >0.9999                 |
| Untreated vs. LBH (5 $\mu$ M)                         | <0.0001                 |
| Untreated vs. Free-NextA (5 $\mu$ M)                  | <0.0001                 |
| Untreated vs. INAPs 0.5 mg/mL                         | <0.0001                 |
| Untreated vs. INAPs 1.0 mg/mL                         | <0.0001                 |
| Untreated vs. INAPs 2.0 mg/mL                         | <0.0001                 |
| Untreated vs. INAPs 4.0 mg/mL                         | <0.0001                 |
| Vehicle (DMSO) vs. LBH (5 $\mu$ M)                    | <0.0001                 |
| Vehicle (DMSO) vs. Free-NextA (5 $\mu$ M)             | <0.0001                 |
| Vehicle (DMSO) vs. INAPs 0.5 mg/mL                    | <0.0001                 |
| Vehicle (DMSO) vs. INAPs 1.0 mg/mL                    | <0.0001                 |
| Vehicle (DMSO) vs. INAPs 2.0 mg/mL                    | <0.0001                 |
| Vehicle (DMSO) vs. INAPs 4.0 mg/mL                    | <0.0001                 |
| LBH (5 $\mu$ M) vs. Free-NextA (5 $\mu$ M)            | 0.2064                  |
| LBH (5 $\mu$ M) vs. INAPs 0.5 mg/mL                   | <0.0001                 |
| LBH (5 $\mu$ M) vs. INAPs 1.0 mg/mL                   | <0.0001                 |
| LBH (5 $\mu$ M) vs. INAPs 2.0 mg/mL                   | 0.0006                  |
| LBH (5 $\mu$ M) vs. INAPs 4.0 mg/mL                   | 0.2979                  |
| Free-NextA (5 $\mu$ M) vs. INAPs 0.5 mg/mL            | <0.0001                 |
| Free-NextA (5 $\mu$ M) vs. INAPs 1.0 mg/mL            | <0.0001                 |
| Free-NextA (5 $\mu$ M) vs. INAPs 2.0 mg/mL            | 0.1027                  |
| Free-NextA (5 $\mu$ M) vs. INAPs 4.0 mg/mL            | >0.9999                 |
| INAPs 0.5 mg/mL vs. INAPs 1.0 mg/mL                   | <0.0001                 |
| INAPs 0.5 mg/mL vs. INAPs 2.0 mg/mL                   | <0.0001                 |
| INAPs 0.5 mg/mL vs. INAPs 4.0 mg/mL                   | <0.0001                 |
| INAPs 1.0 mg/mL vs. INAPs 2.0 mg/mL                   | 0.0065                  |
| INAPs 1.0 mg/mL vs. INAPs 4.0 mg/mL                   | <0.0001                 |
| INAPs 2.0 mg/mL vs. INAPs 4.0 mg/mL                   | 0.0666                  |

c)

| Multiple comparisons test (figure 4c, + laser) | Adjusted P Value |
|------------------------------------------------|------------------|
| Untreated vs. Vehicle                          | 0.4308           |
| Untreated vs. LBH (5 $\mu$ M)                  | <0.0001          |
| Untreated vs. Free-NextA (5 $\mu$ M)           | <0.0001          |
| Untreated vs. Day 0                            | <0.0001          |
| Untreated vs. Day 7                            | <0.0001          |
| Vehicle vs. LBH (5 $\mu$ M)                    | <0.0001          |
| Vehicle vs. Free-NextA (5 $\mu$ M)             | <0.0001          |
| Vehicle vs. Day 0                              | <0.0001          |
| Vehicle vs. Day 7                              | <0.0001          |
| LBH (5 $\mu$ M) vs. Free-NextA (5 $\mu$ M)     | 0.8856           |
| LBH (5 $\mu$ M) vs. Day 0                      | 0.9766           |
| LBH (5 $\mu$ M) vs. Day 7                      | 0.9172           |
| Free-NextA (5 $\mu$ M) vs. Day 0               | 0.9984           |
| Free-NextA (5 $\mu$ M) vs. Day 7               | >0.9999          |
| Day 0 vs. Day 7                                | 0.9996           |

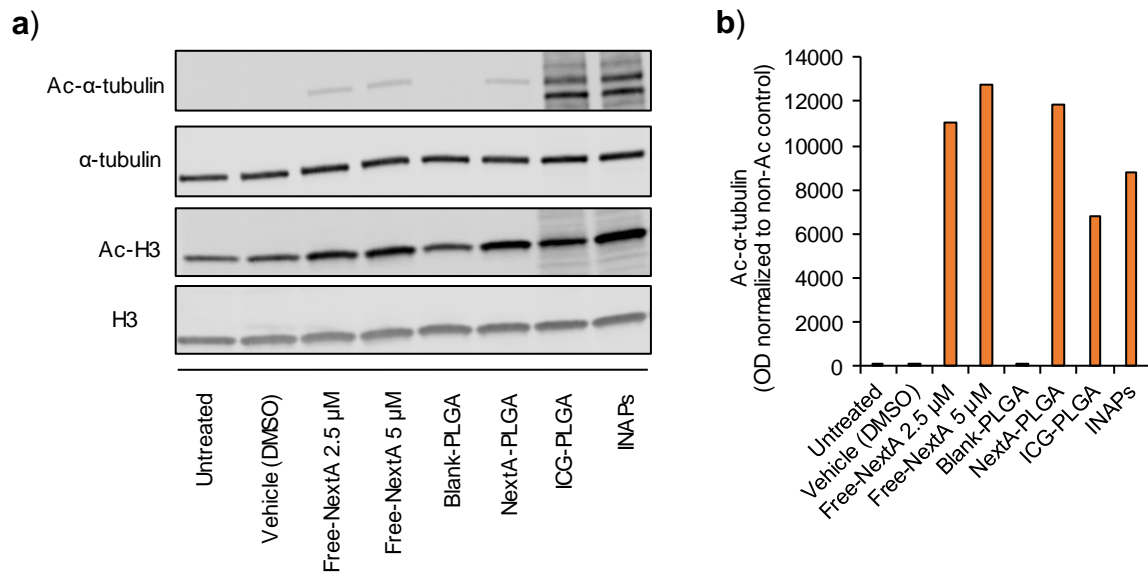

**Figure S6.** Effect of INAPs on the inhibition of HDAC6 activity in SM1 melanoma cells *in vitro*. SM1 cells were treated with 1.0 mg/mL INAPs for 24 hours. Post-treatment, the cells were collected and lysed for protein collection. **(a)** Cells were blotted for protein expression of Ac- $\alpha$ -tubulin,  $\alpha$ -tubulin, Ac-H3, and H3. **(b)** Normalized expression of Ac- $\alpha$ -tubulin. Analysis comparing ICG-PLGA and INAPs was conducted separately from the other groups due to a difference in the background.



a)

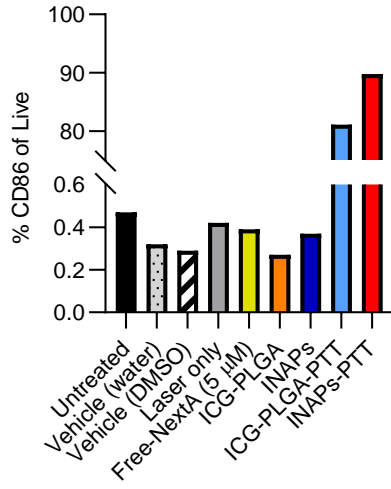

b)

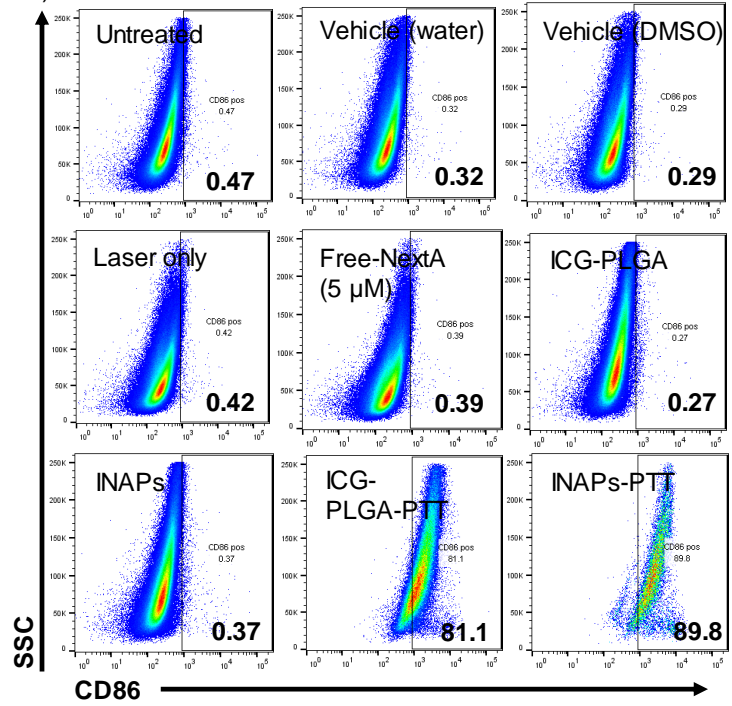

c)

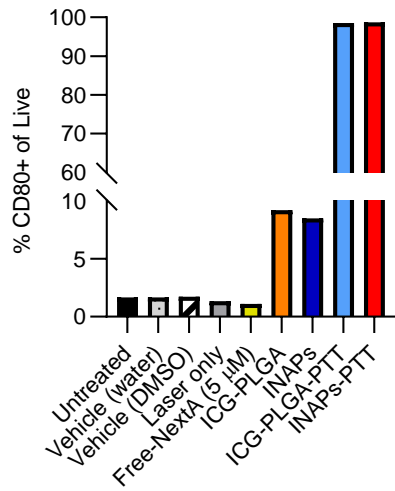

d)

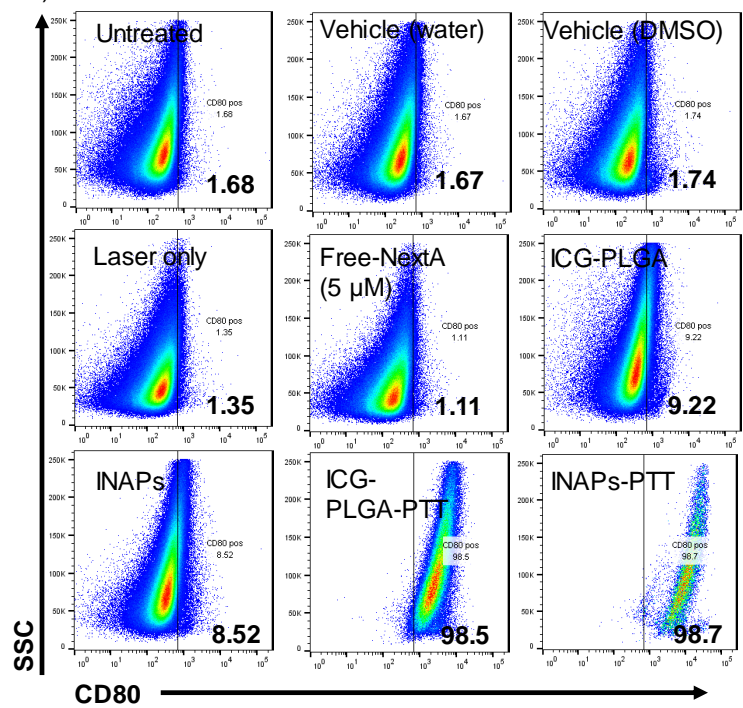

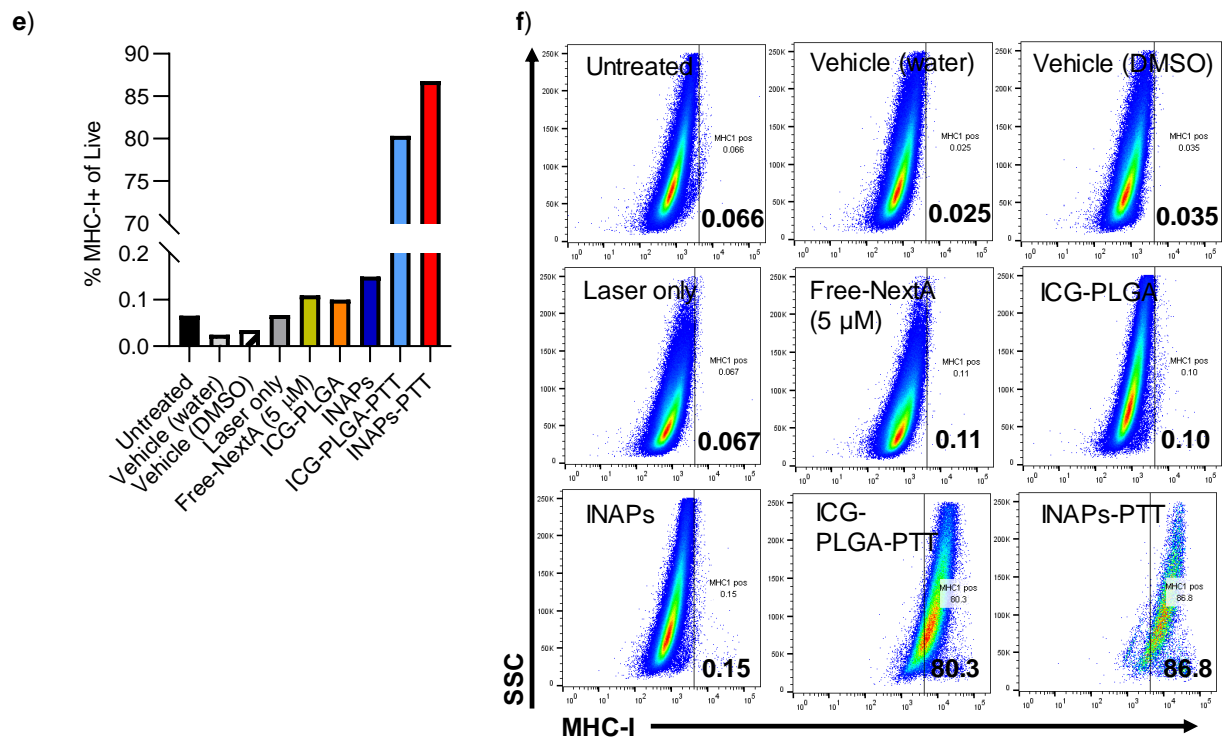

**Figure S7.** Effect of INAPs-PTT on the expression of immunomodulatory markers on SM1 melanoma cells *in vitro*. SM1 cells were treated with 2.0 mg/mL INAPs and irradiated with NIR laser for 5 minutes at 0.4-0.6 W. Treated cells were incubated overnight and then stained and assessed by flow cytometry for the percentage of live cells expressing of (a) CD86, (c) CD80, and (e) MHC Class I (MHC-I). Respective scatter plots demonstrate gating of (b) CD86+, (d) CD80+, and (f) MHC-I+ live cells. Untreated, water, DMSO, laser only, Free-NextA, and ICG-PLGA served as controls.

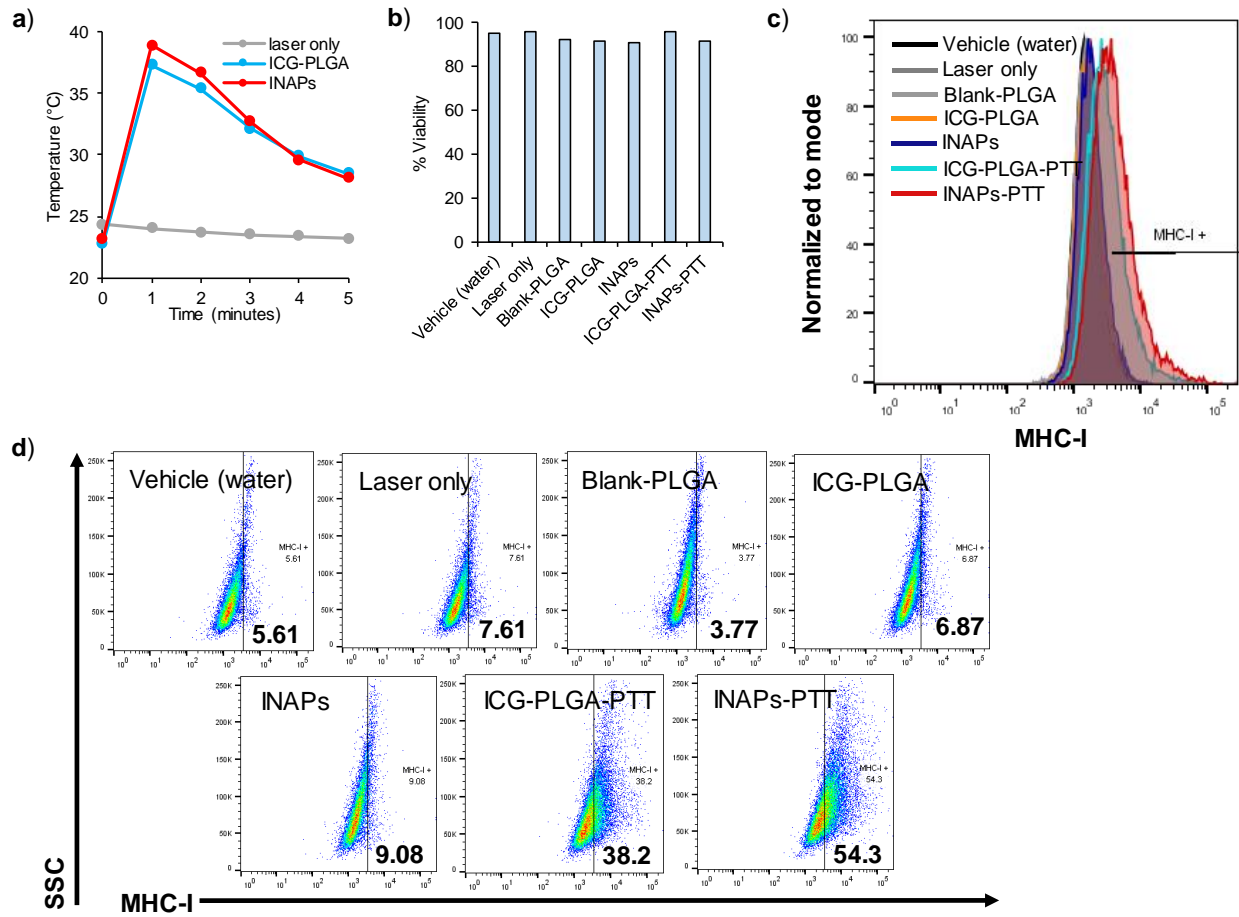

**Figure S8.** Effect of INAPs-PTT on the expression of immunomodulatory markers on B16-F10 melanoma cells *in vitro*. B16-F10 melanoma cells were treated with 1.0 mg/mL INAPs and irradiated with NIR laser for 5 minutes at 0.8 W. (a) Time-temperature trajectories of B16-F10 cells treated with INAPs-PTT or ICG-PLGA-PTT. The treated cells were incubated overnight, stained, and assessed by flow cytometry for (b) viability, (c) MHC-I expression (MFI), and (d) percentages live cells expressing MHC-I.

**Table S3.** Description of the PLGA nanoparticle properties of the cited references in the Discussion section (section 4) of the main text.

a)

| Drug-loaded PLGA nanoparticles compared to free drug |                                                  |                    |                       |                       |                                                                                            |      |
|------------------------------------------------------|--------------------------------------------------|--------------------|-----------------------|-----------------------|--------------------------------------------------------------------------------------------|------|
| Nanoparticle                                         | Cancer/disease                                   | Type of synthesis  | Drug(s) encapsulated  | Type of therapy       | Effect compared to free drug(s)                                                            | Ref. |
| 5-FU-loaded PLGA nanoparticles                       | glioblastoma (U87MG), breast cancer (MCF7)       | double-emulsion    | 5-Fluorouracil        | chemotherapy          | higher S-phase cycle arrest                                                                | 4    |
| NUC-PLGA nanoparticles                               | obesity, atherosclerosis (HepG2, Sprague Dawley) | emulsion           | Nuciferine            | metabolism            | lower intracellular triglyceride accumulation; improved pharmacokinetics in plasma         | 7    |
| DOX-CUR loaded PLGA nanoparticles                    | leukemia (K562)                                  | single emulsion    | Doxorubicin, Curcumin | adjuvant chemotherapy | induce apoptosis at lower concentrations compared to free drug, enhanced K562 cytotoxicity | 8    |
| PTX-CP PEG-PLGA nanoparticles                        | non-small cell lung cancer (344SQ, H460, A549)   | Nano-precipitation | Paclitaxel, Cisplatin | chemo-radiotherapy    | improved cytotoxicity with CP-loaded NPs, improve antitumor efficacy of radiotherapy       | 9    |

b)

| Co-Encapsulation in PLGA nanoparticles |                                  |                                               |                               |                                      |                                                                                                                                                                           |      |
|----------------------------------------|----------------------------------|-----------------------------------------------|-------------------------------|--------------------------------------|---------------------------------------------------------------------------------------------------------------------------------------------------------------------------|------|
| Nanoparticle                           | Cancer/disease                   | Type of synthesis                             | Drug(s) encapsulated          | Type of therapy                      | Effect compared to free drug(s)                                                                                                                                           | Ref. |
| PLGA-ICG-R837 nanoparticles            | metastatic cancer (4T1, CT26)    | single emulsion                               | Indocyanine green (ICG), R837 | immune-adjuvant photothermal therapy | higher DC maturation and activation, slower secondary tumor growth rate, improved survival with anti-CTLA-4                                                               | 22   |
| DOX-ICG PEG-PLGA nanoparticles         | breast cancer (MCF-7, MCF-7/ADR) | single-step sonication with nanoprecipitation | Doxorubicin, ICG              | chemo-photothermal therapy           | enhanced cellular uptake of drugs, synergistically induced apoptosis and cell death of chemo-resistant cancer cells, higher drug accumulation in tumor, improved survival | 42   |
